# Supplementary material
Source: publisher figshare collection journal article supplement (https://acs.figshare.com/ndownloader/files/3987004)
Supplement: Supplementary file 1 [file 3987004]

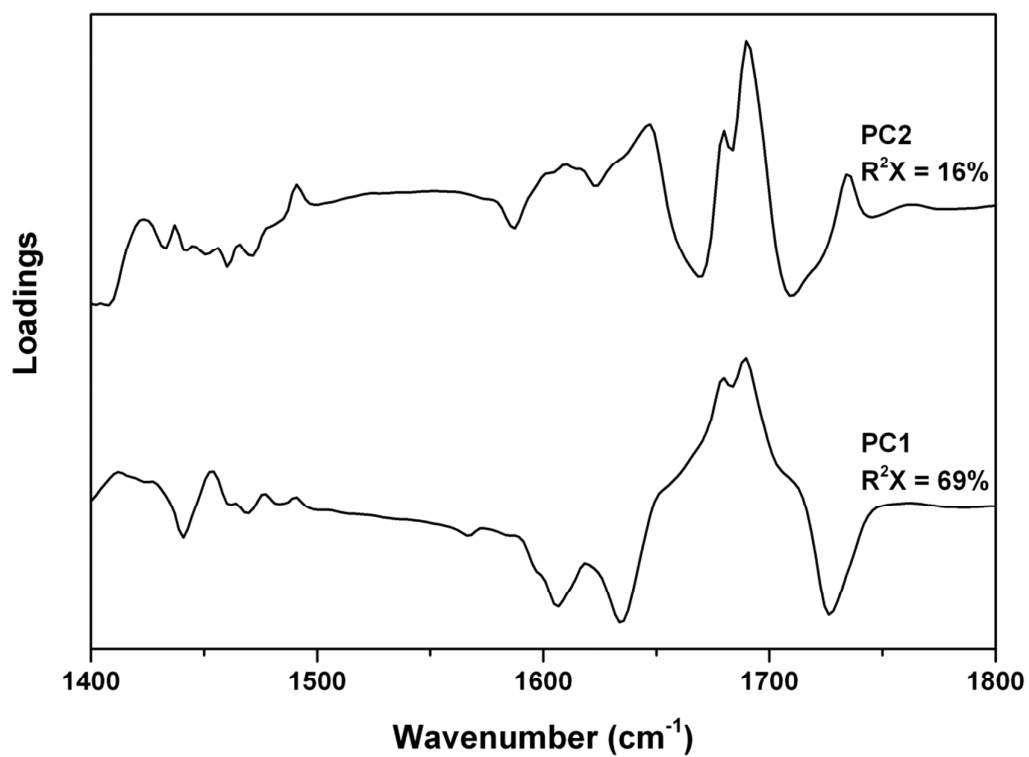

Figure 1. Corresponding PCA loadings plot of the scores plot obtained at pH 1.2

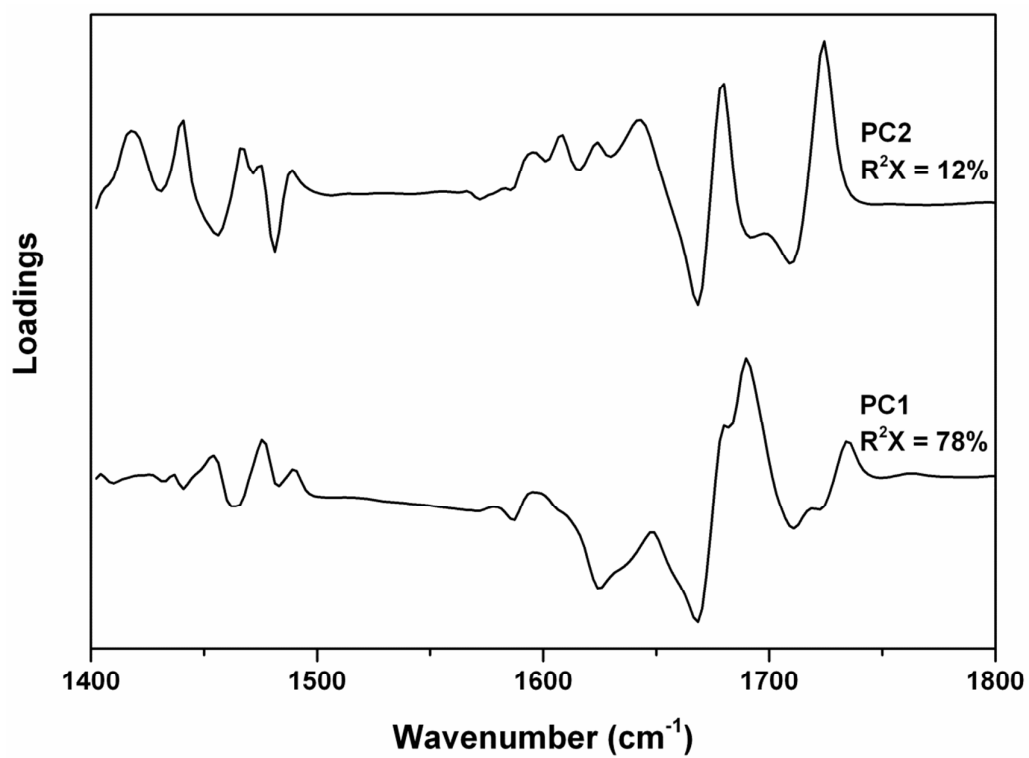

Figure 2. Corresponding PCA loadings plot of the scores plot obtained at pH 4.5

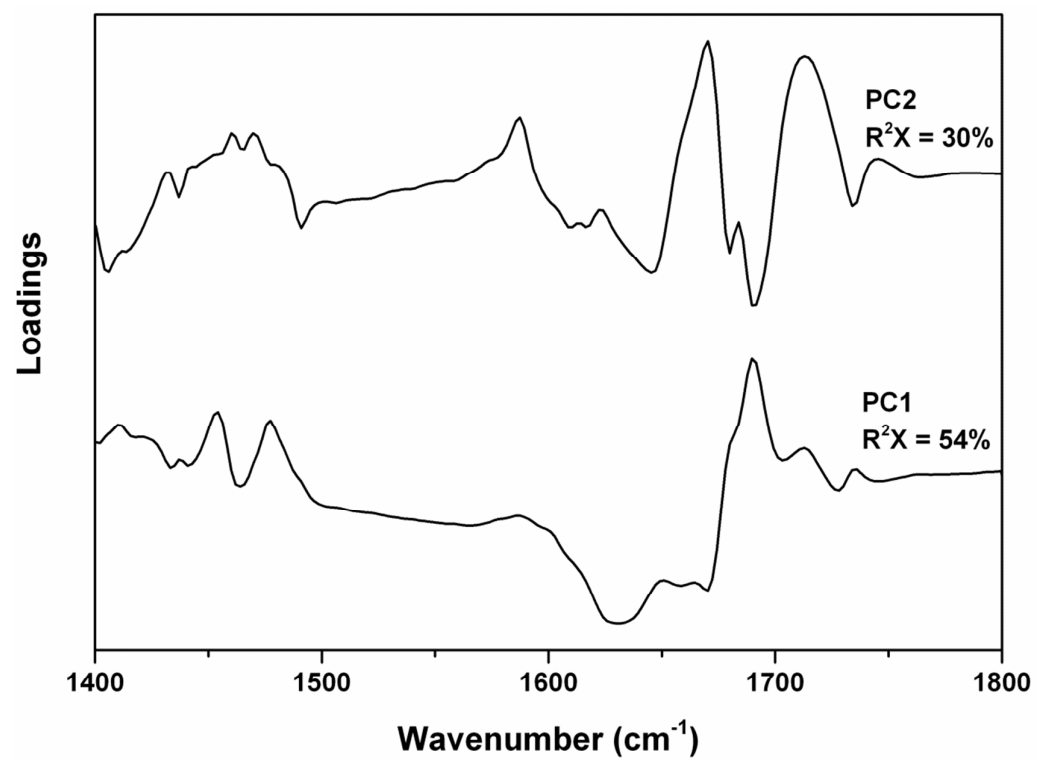

Figure 3. Corresponding PCA loadings plot of the scores plot obtained at pH 6.8
